# Supplementary material for: Novel Triphenylantimony(V) and Triphenylbismuth(V) Complexes with Benzoic Acid Derivatives: Structural Characterization, in Vitro Antileishmanial and Antibacterial Activities and Cytotoxicity against Macrophages
Source: MDPI journal article supplement (doi:10.3390/molecules19056009), 2014-05-12

## Supplementary Data

**Figure S1.**  $^1\text{H}$ -NMR spectrum of the free ligand acetylsalicylic acid (HL1) in  $\text{CDCl}_3$  taken at 27  $^\circ\text{C}$ .

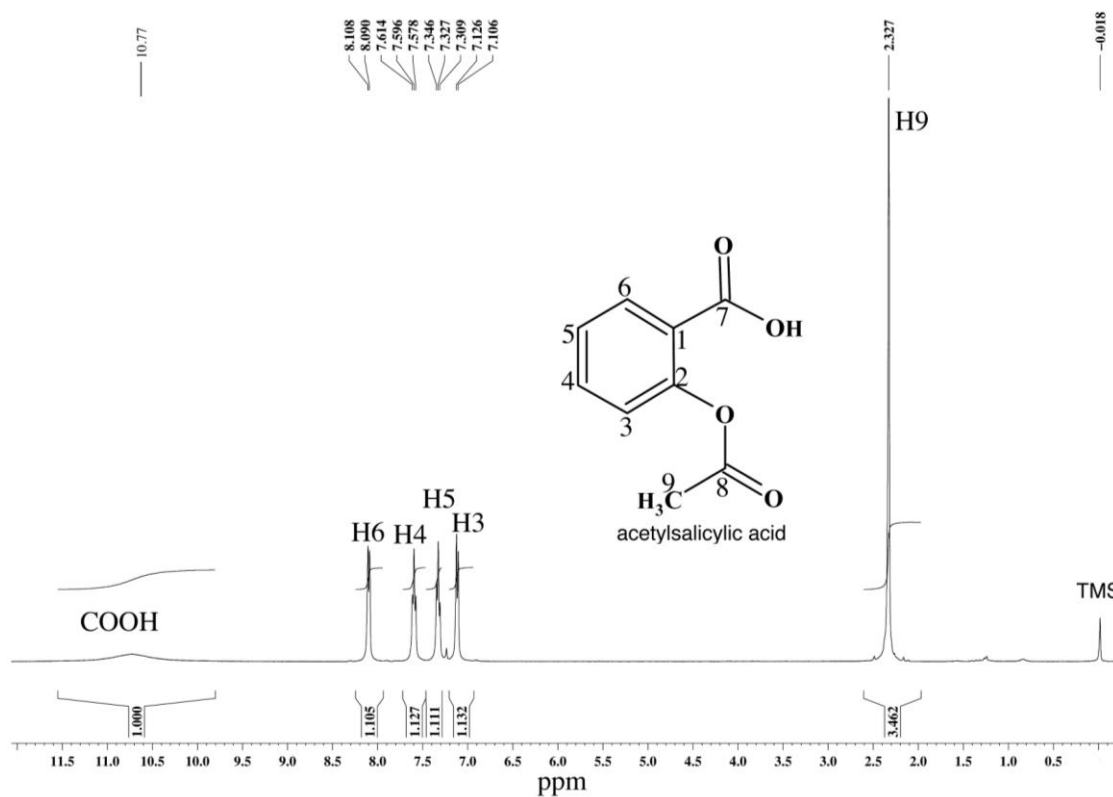

**Figure S2.**  $^1\text{H}$ -NMR spectrum of bis-(acetoysalicylato)triphenylbismuth(V) – complex **3**, in  $\text{CDCl}_3$  taken at 27  $^\circ\text{C}$ .

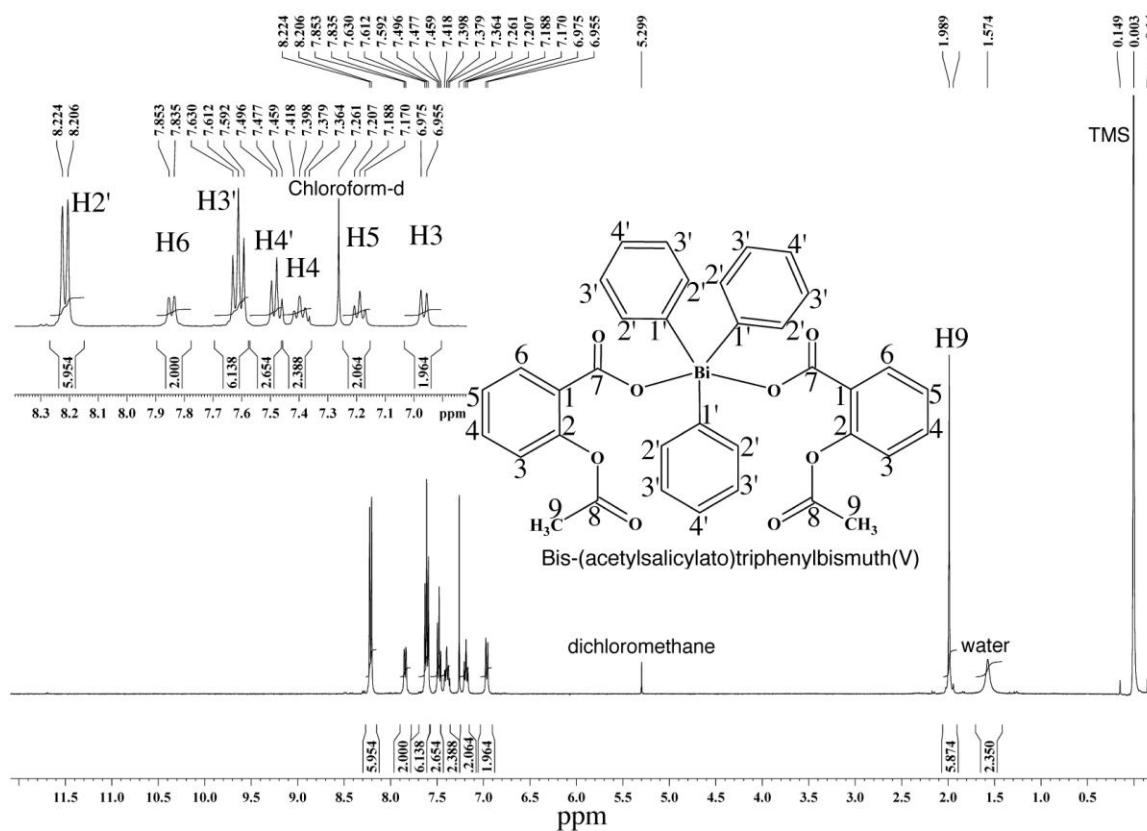

**Figure S3.**  $^{13}\text{C}$ -NMR spectrum of the free ligand acetylsalicylic acid (HL1) in  $\text{CDCl}_3$  taken at 27 °C.

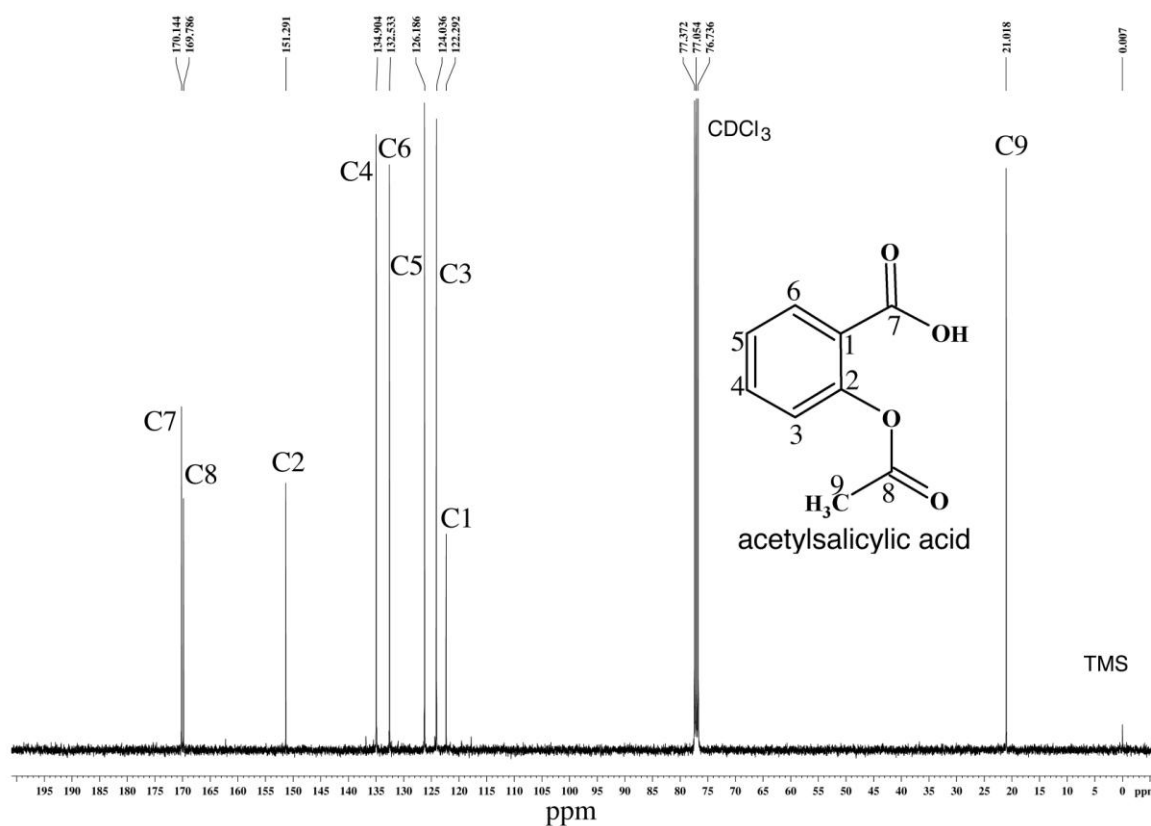

**Figure S4.**  $^{13}\text{C}$ -NMR spectrum of bis-(acetoysalicylato)triphenylbismuth(V) – complex 2, in  $\text{CDCl}_3$  taken at 27 °C.

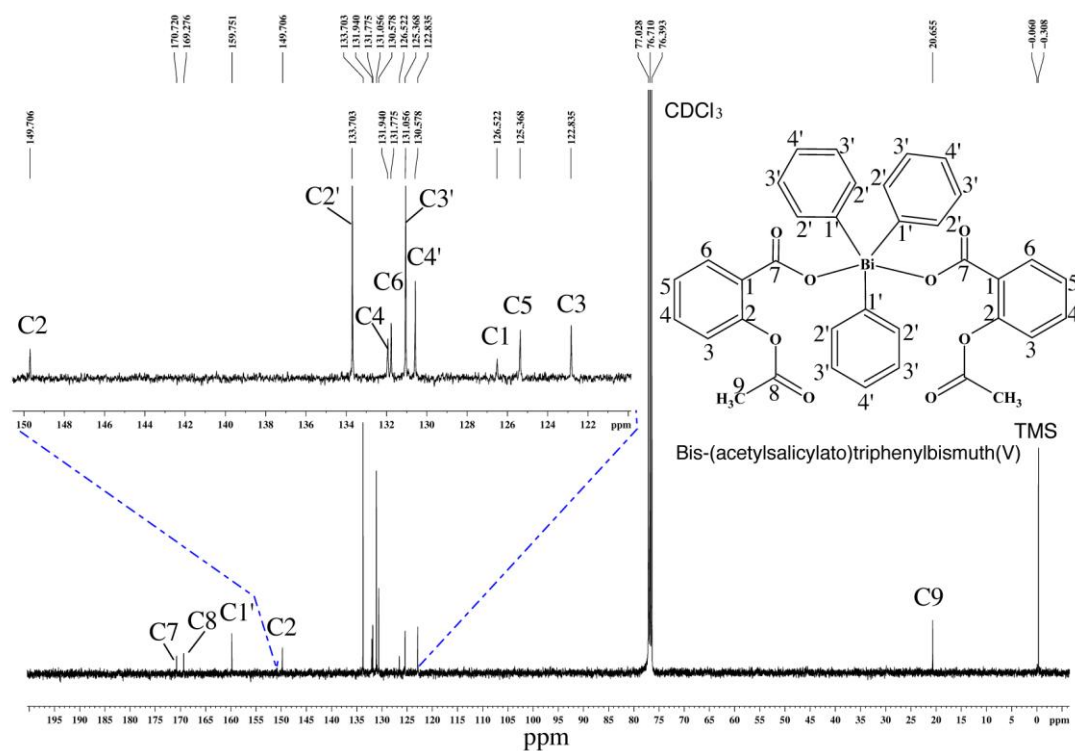

Supplement: s1 [file s1]
